# Supplementary material
Source: MDPI journal article supplement (https://www.mdpi.com/search?q=molecules-24-03336)
Supplement: s001 [file molecules-24-03336-s001.pdf]

## Supplementary Materials

# Phytochemical investigation of *Tradescantia albiflora* and anti-inflammatory butenolide derivatives

Ping-Chen Tu <sup>1</sup>, Han-Chun Tseng <sup>2</sup>, Yu-Chia Liang <sup>3</sup>, Guan-Jhong Huang <sup>3</sup>, Te-Ling Lu <sup>4,†</sup>, Tzong-Fu Kuo <sup>5,†</sup> and Yueh-Hsiung Kuo <sup>3,6,7,\*</sup>

<sup>1</sup> The Ph.D. Program for Cancer Biology and Drug Discovery, China Medical University and Academia Sinica, Taichung 404, Taiwan

<sup>2</sup> Department of Chemistry, National Taiwan University, Taipei 106, Taiwan

<sup>3</sup> Department of Chinese Pharmaceutical Sciences and Chinese Medicine Resources, China Medical University, Taichung 404, Taiwan

<sup>4</sup> School of Pharmacy, China Medical University, Taichung 404, Taiwan

<sup>5</sup> Department of Post-Baccalaureate Veterinary Medicine, Asia University, Taichung 413, Taiwan

<sup>6</sup> Department of Biotechnology, Asia University, Taichung 413, Taiwan

<sup>7</sup> Chinese Medicine Research Center, China Medical University, Taichung 404, Taiwan

† The authors contributed equally to this work

\* Correspondence: kuoyh@mail.cmu.edu.tw; Tel.: +886-4-2205-3366ext.5709 (Y.-H.K.)

Figure S1. IR spectrum of compound **1**.  
Figure S2. HRESIMS data of compound **1**.  
Figure S3.  $^1\text{H}$  NMR spectrum of compound **1** in methanol- $d_4$ .  
Figure S4.  $^{13}\text{C}$  NMR spectrum of compound **1** in methanol- $d_4$ .  
Figure S5. HSQC spectrum of compound **1** in methanol- $d_4$ .  
Figure S6. HMBC spectrum of compound **1** in methanol- $d_4$ .  
Figure S7. COSY spectrum of compound **1** in methanol- $d_4$ .  
Figure S8. IR spectrum of compound **2**.  
Figure S9. HRESIMS data of compound **2**.  
Figure S10.  $^1\text{H}$  NMR spectrum of compound **2** in acetone- $d_6$ .  
Figure S11.  $^{13}\text{C}$  NMR spectrum of compound **2** in acetone- $d_6$ .  
Figure S12. HSQC spectrum of compound **2** in acetone- $d_6$ .  
Figure S13. HMBC spectrum of compound **2** in acetone- $d_6$ .  
Figure S14. IR spectrum of compound **11**.  
Figure S15. HRESIMS data of compound **11**.  
Figure S16.  $^1\text{H}$  NMR spectrum of compound **11** in acetone- $d_6$ .  
Figure S17.  $^{13}\text{C}$  NMR spectrum and DEPT spectrum of compound **11** in acetone- $d_6$ .  
Figure S18. HSQC spectrum of compound **11** in acetone- $d_6$ .  
Figure S19. HMBC spectrum of compound **11** in acetone- $d_6$ .  
Figure S20. COSY spectrum of compound **11** in acetone- $d_6$ .  
Figure S21. NOESY spectrum of compound **11** in acetone- $d_6$ .  
Figure S22. Effects of compounds **4**, **4b**, **4d**, **6**, and **7** on NO production in LPS-stimulated RAW 264.7 macrophages  
Figure S23. Effects of compounds **4**, **4b**, **4d**, **6**, and **7** on cell viability of RAW 264.7 macrophages.

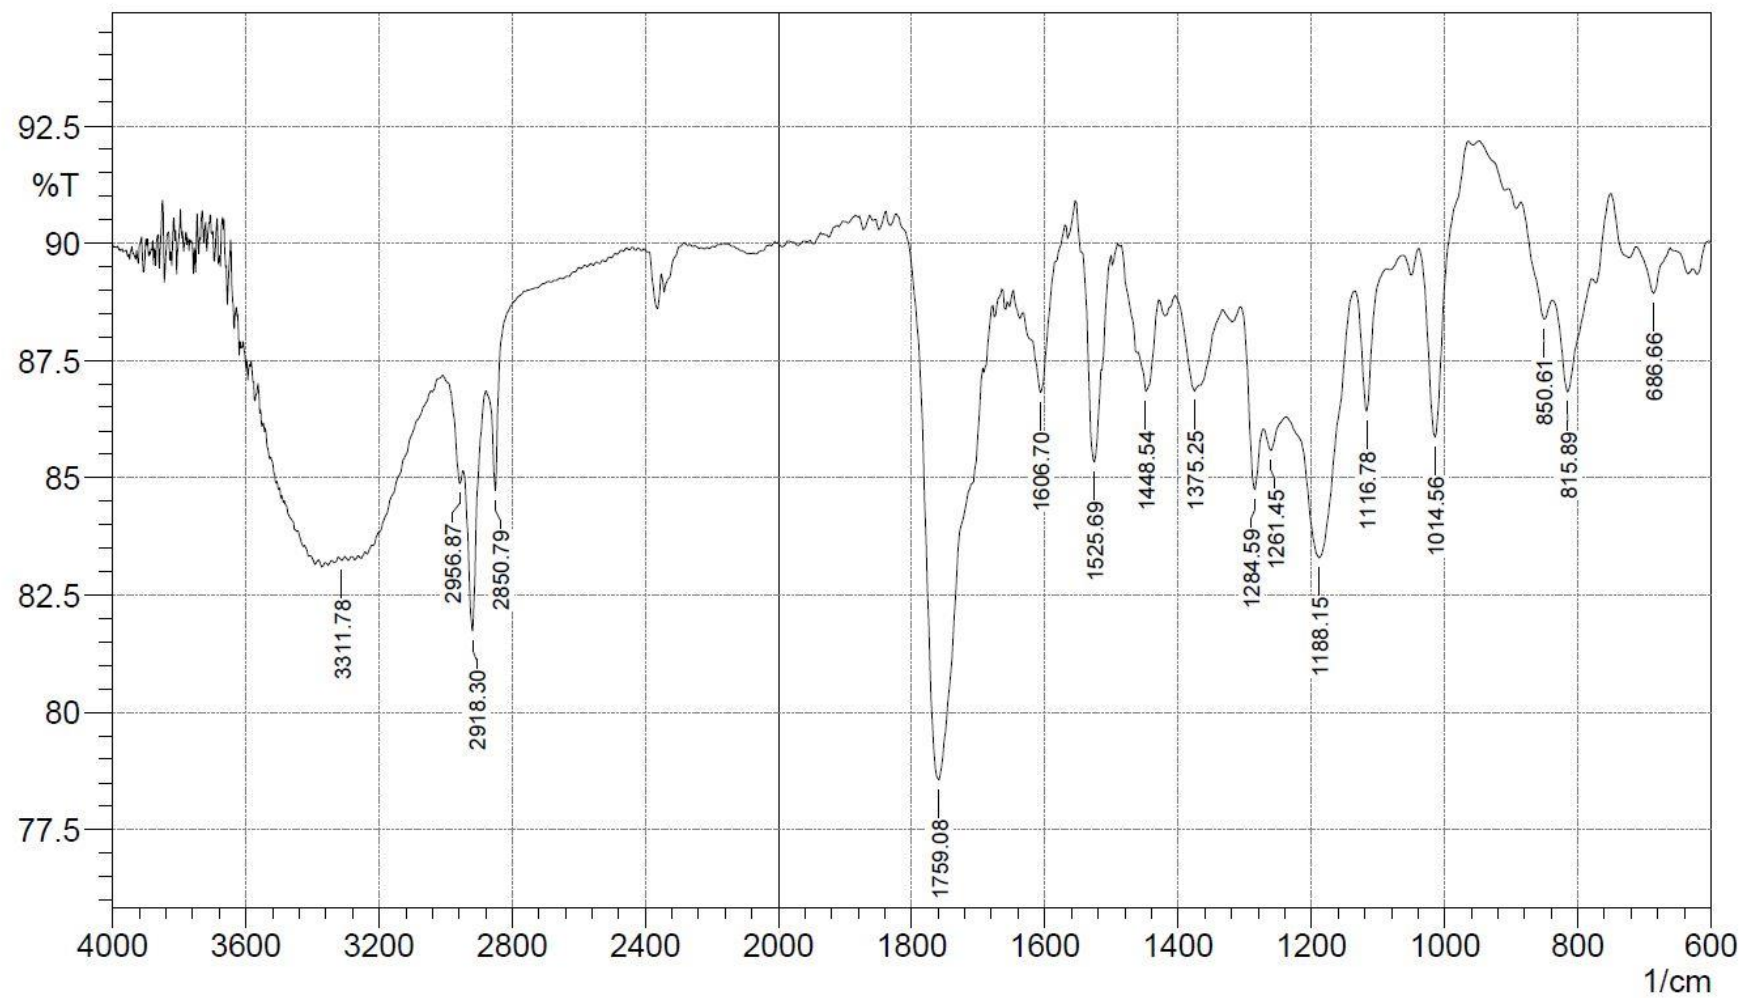

Figure S1. IR spectrum of compound **1**.

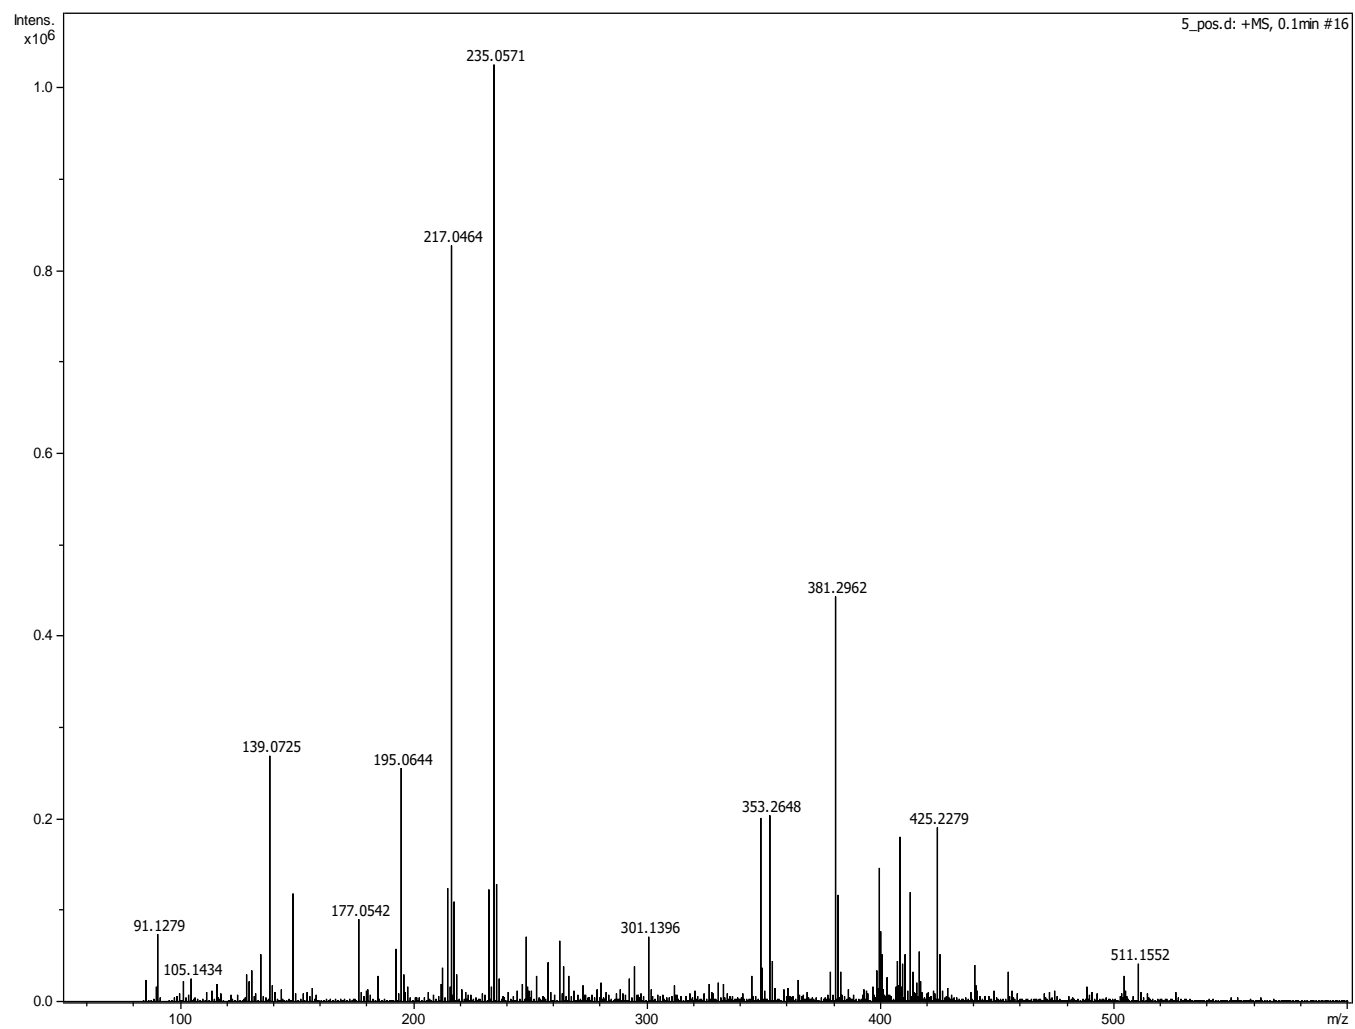

Figure S2. HRESIMS data of compound **1**.

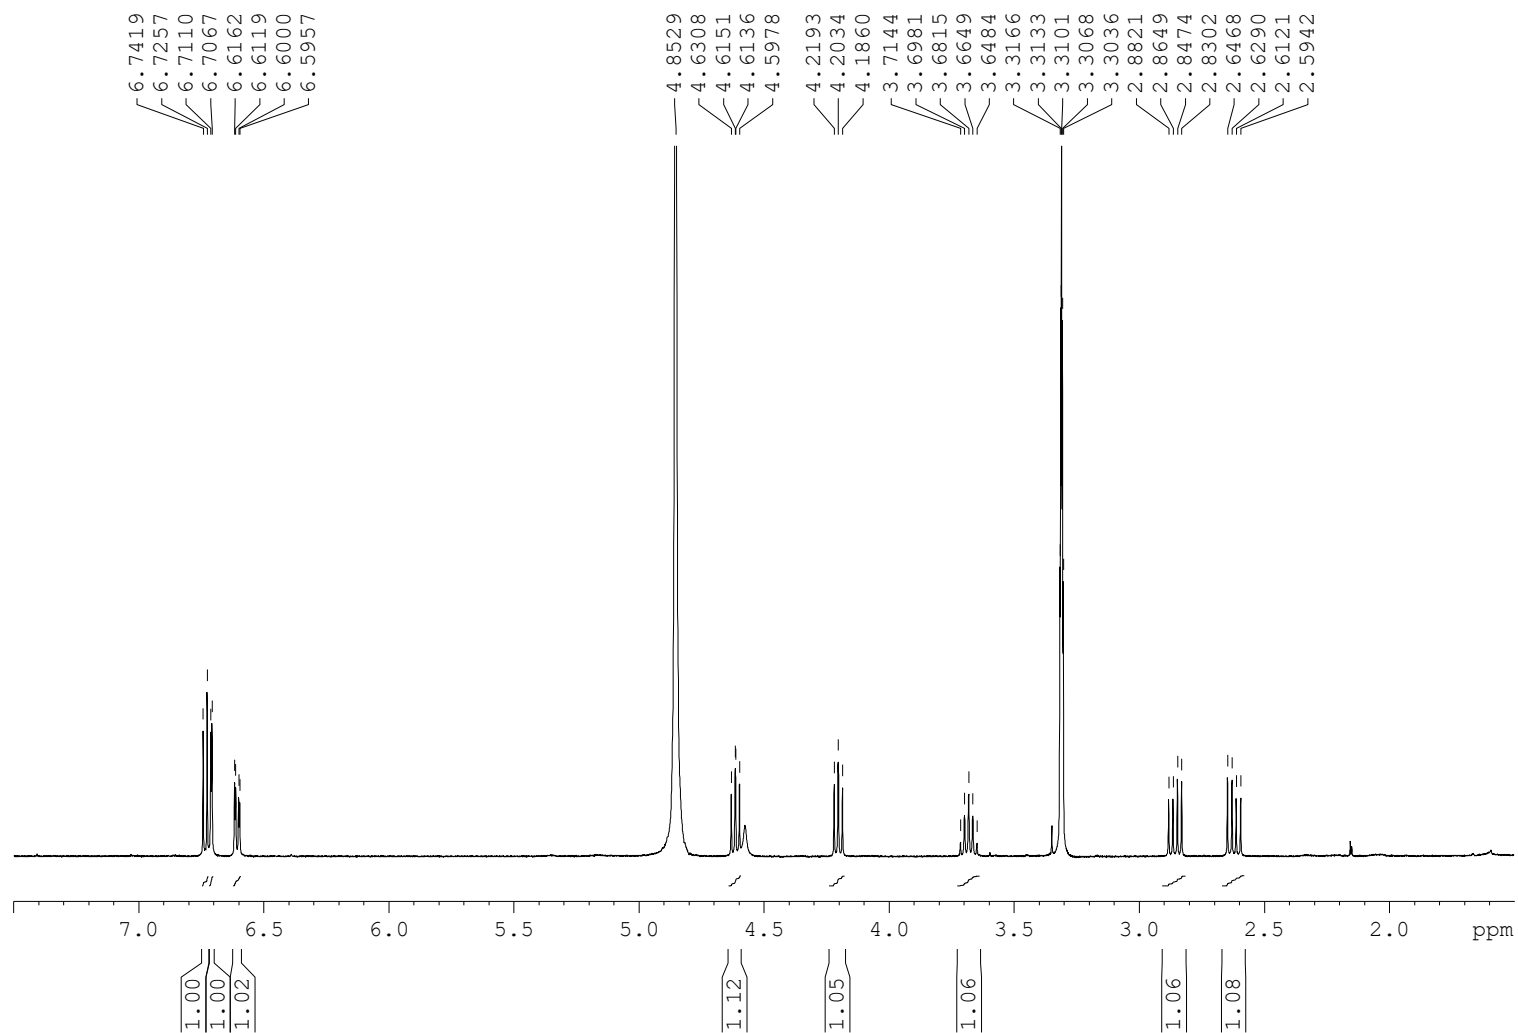

Figure S3. <sup>1</sup>H NMR spectrum of compound **1** in methanol-*d*<sub>4</sub>.

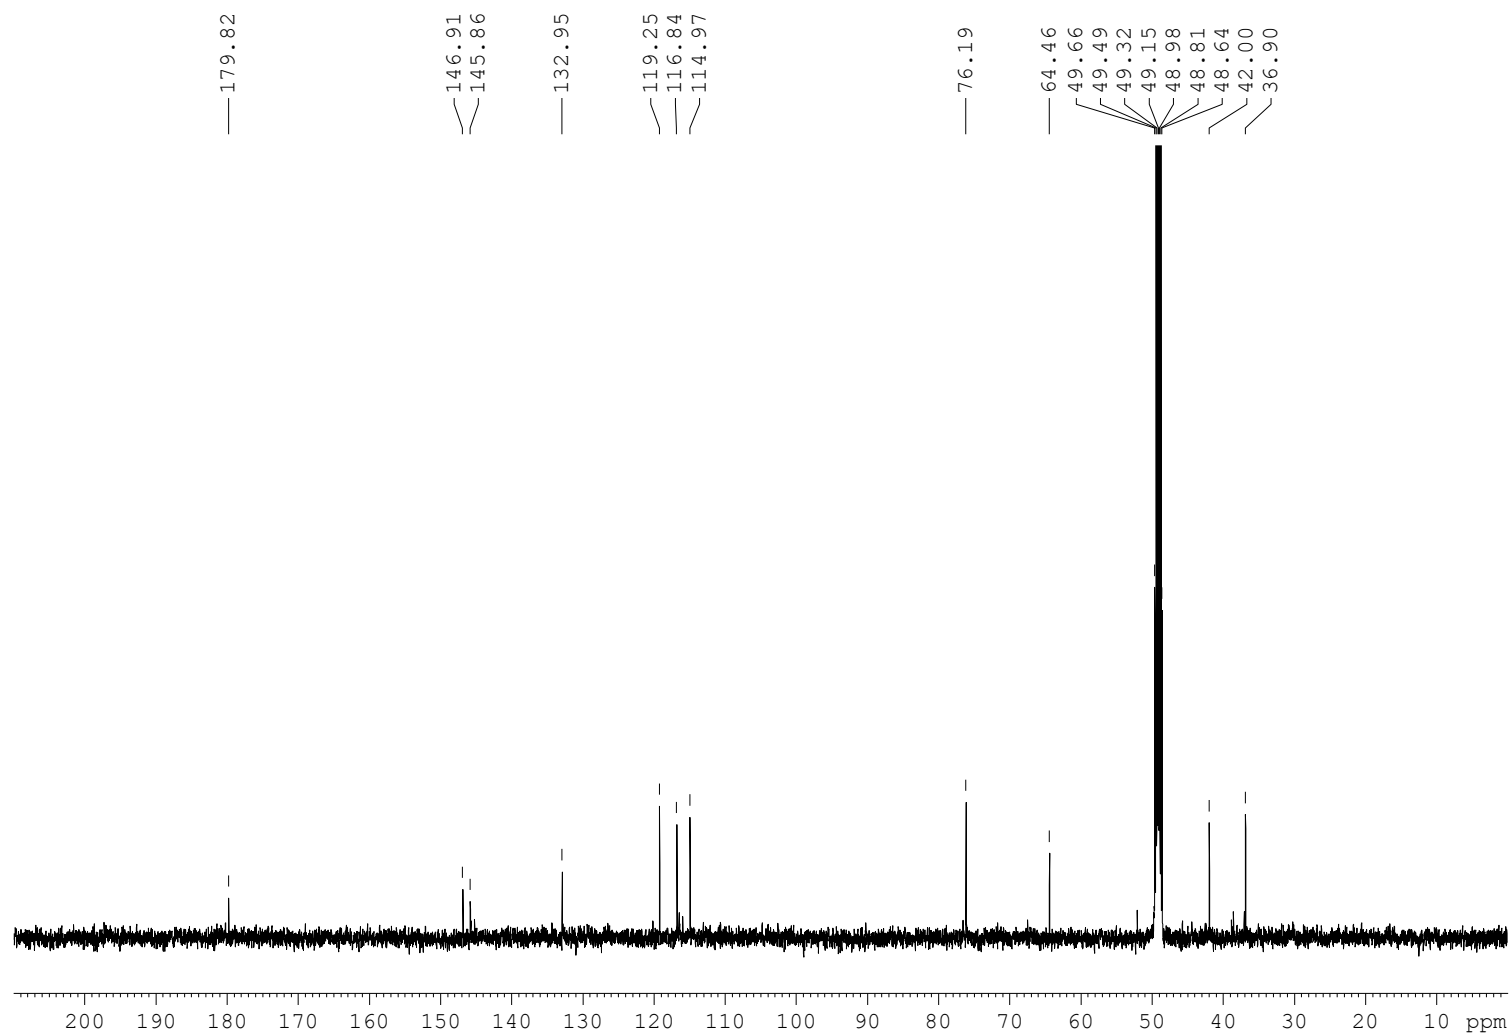

Figure S4.  $^{13}\text{C}$  NMR spectrum of compound **1** in methanol- $d_4$ .

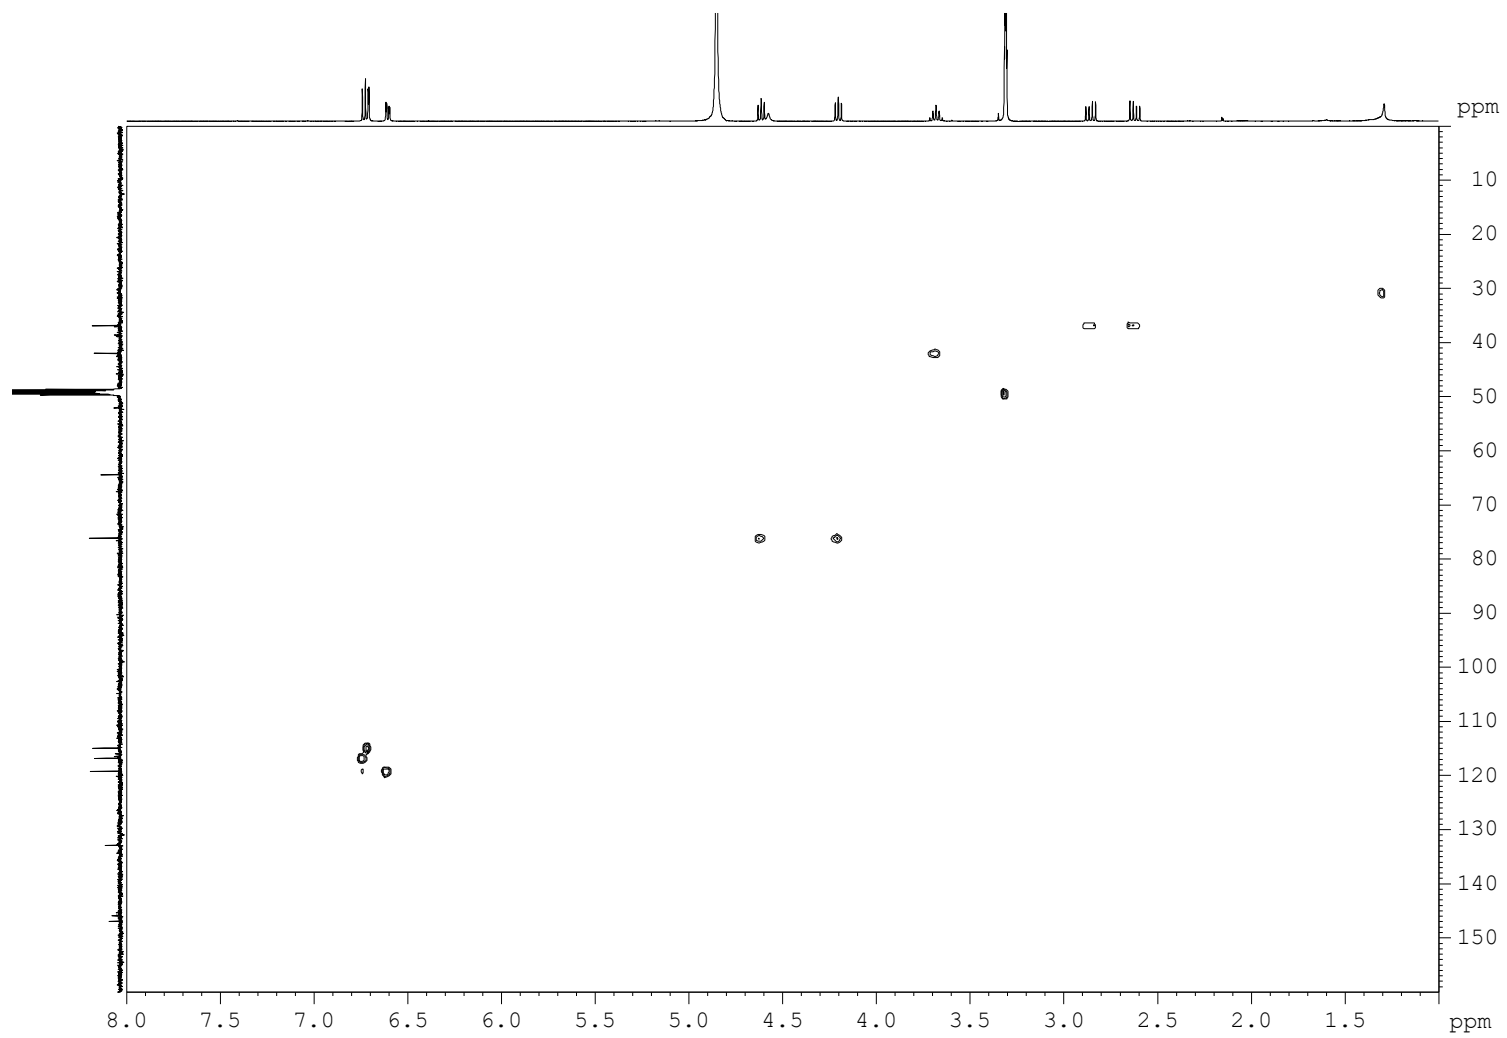

Figure S5. HSQC spectrum of compound **1** in methanol-*d*<sub>4</sub>.

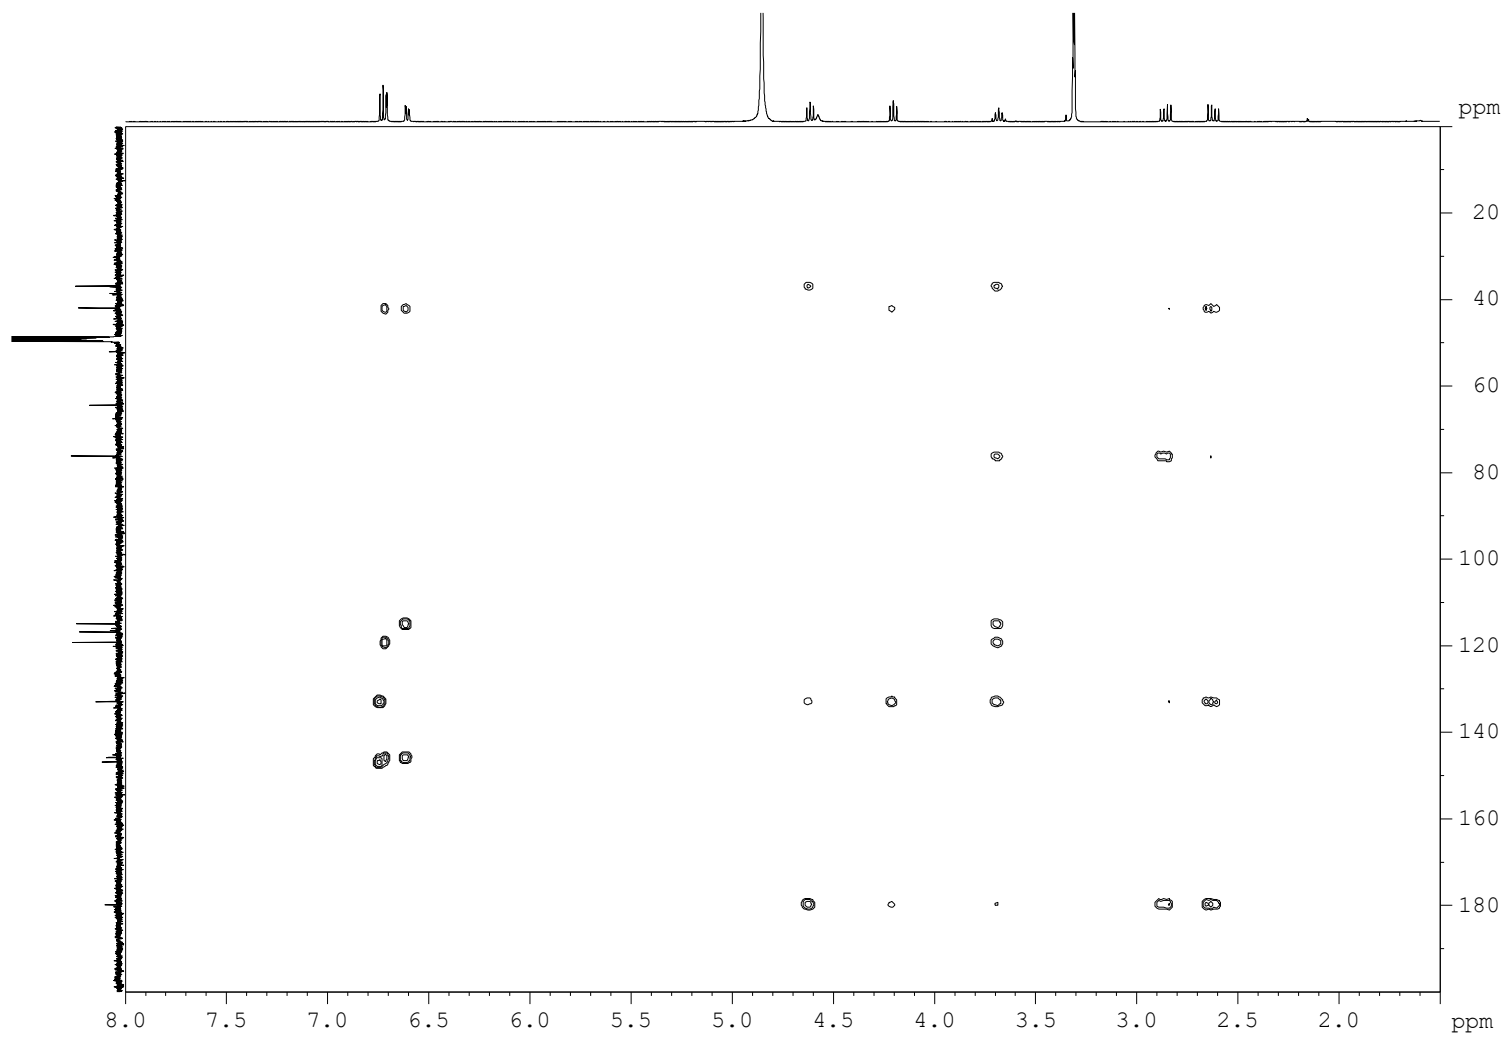

Figure S6. HMBC spectrum of compound **1** in methanol-*d*<sub>4</sub>.



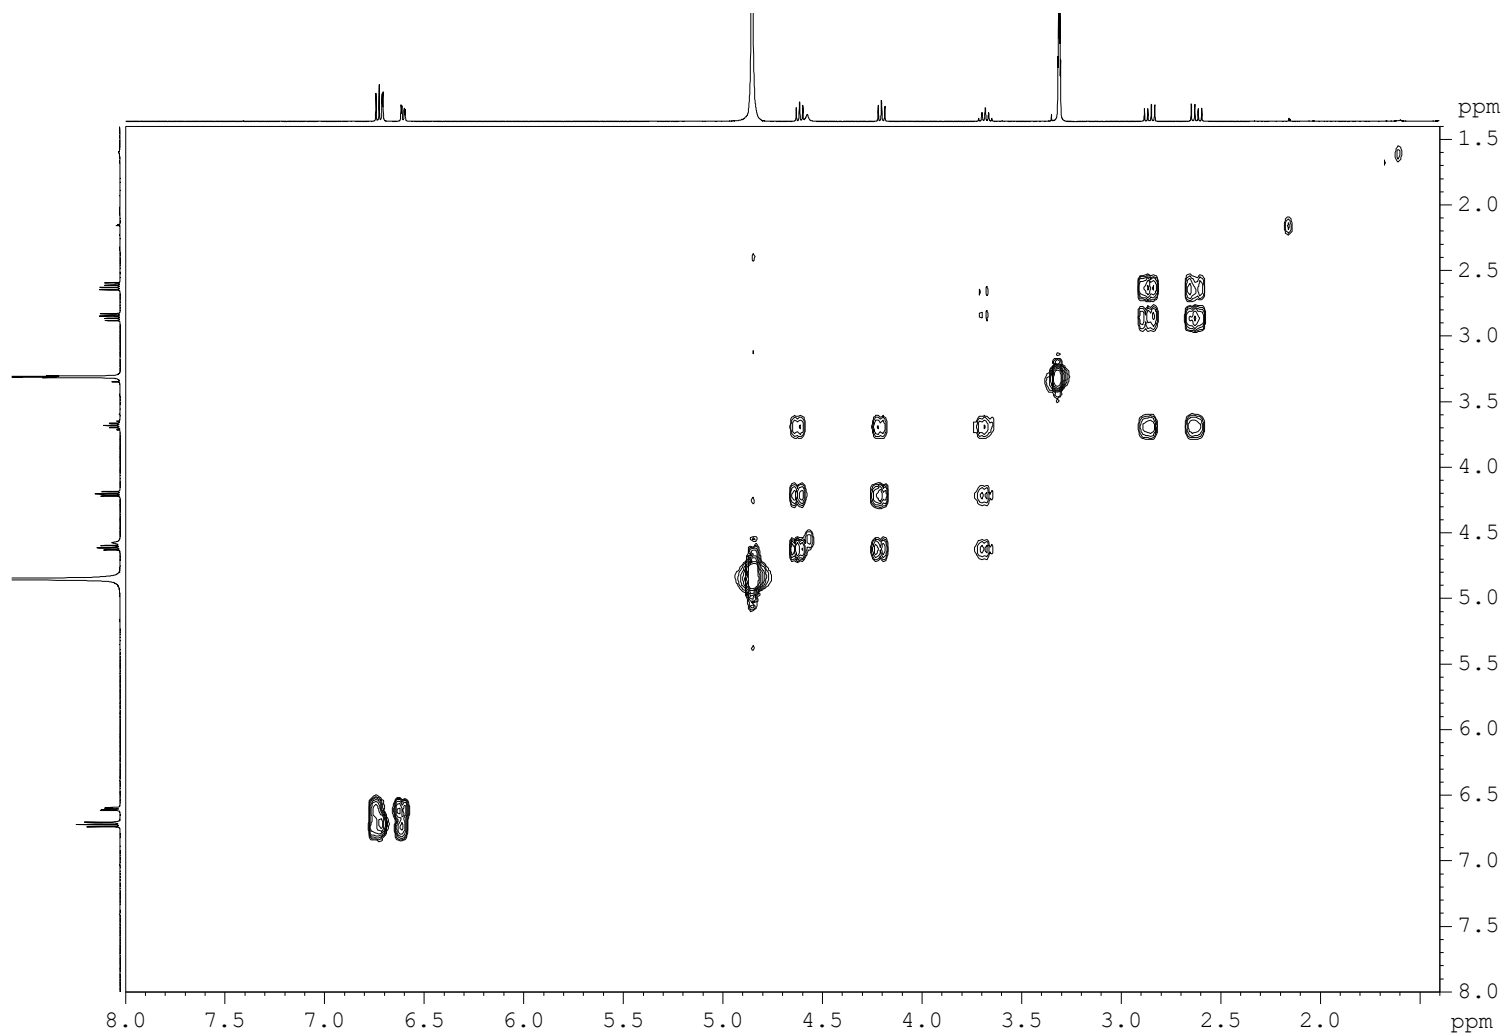

Figure S7. COSY spectrum of compound **1** in methanol- $d_4$ .

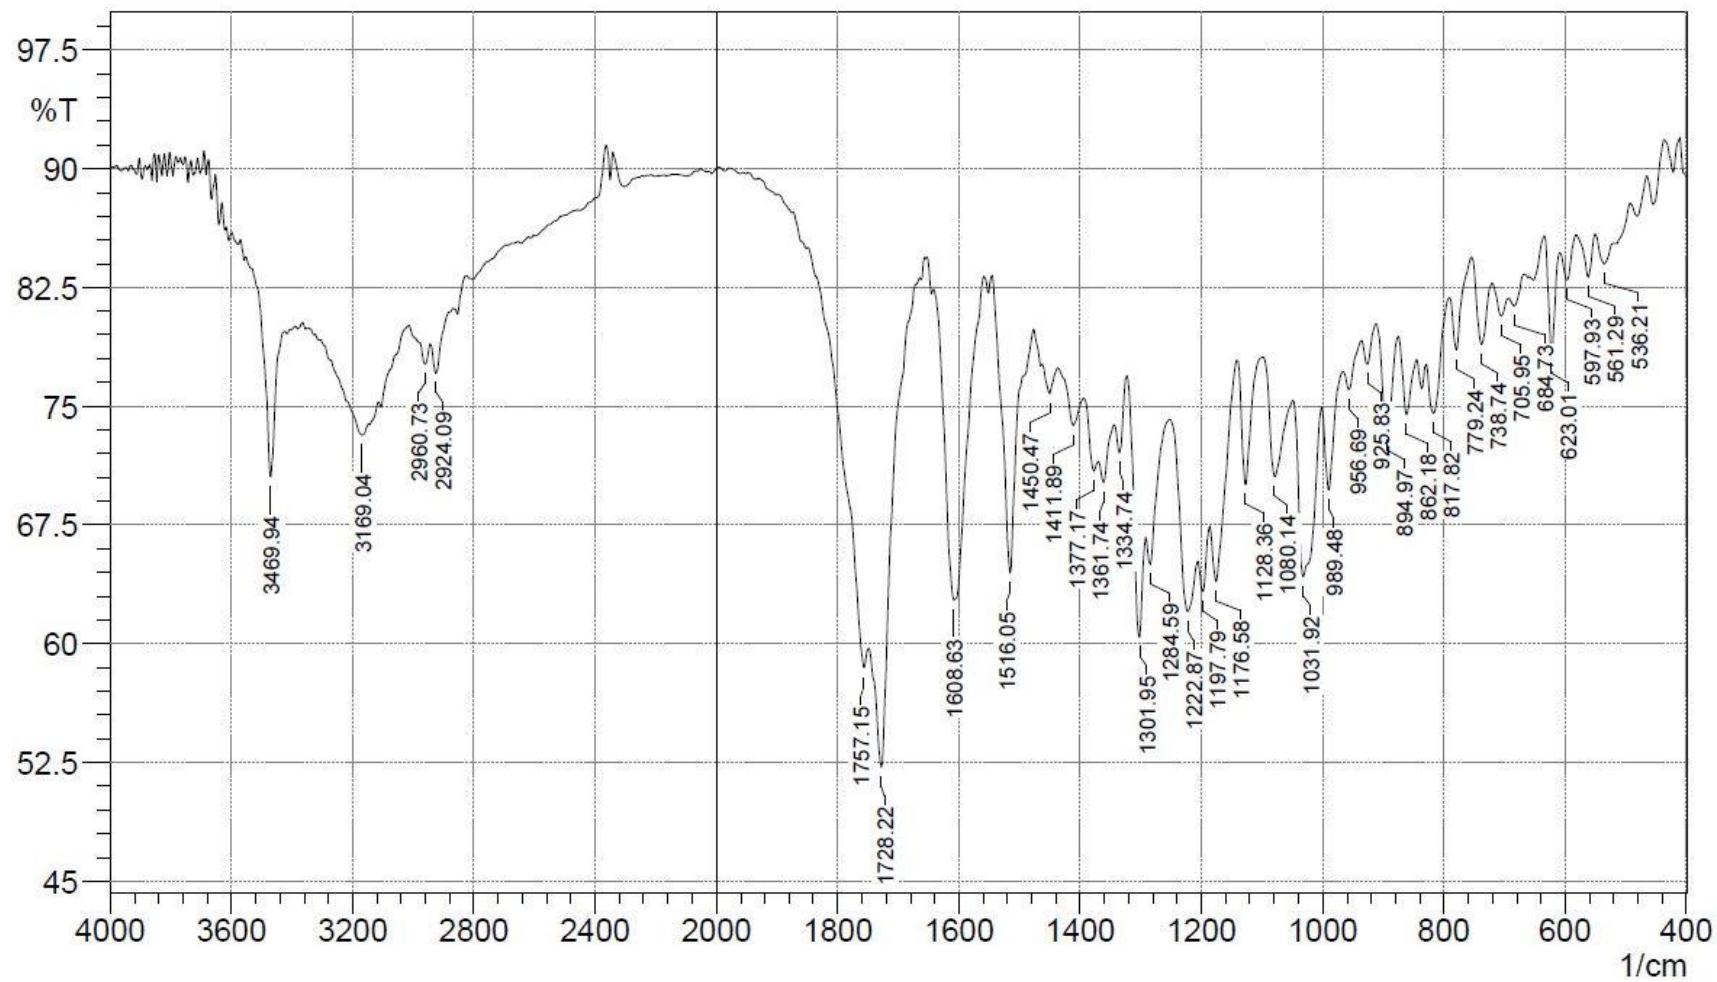

Figure S8. IR spectrum of compound 2.

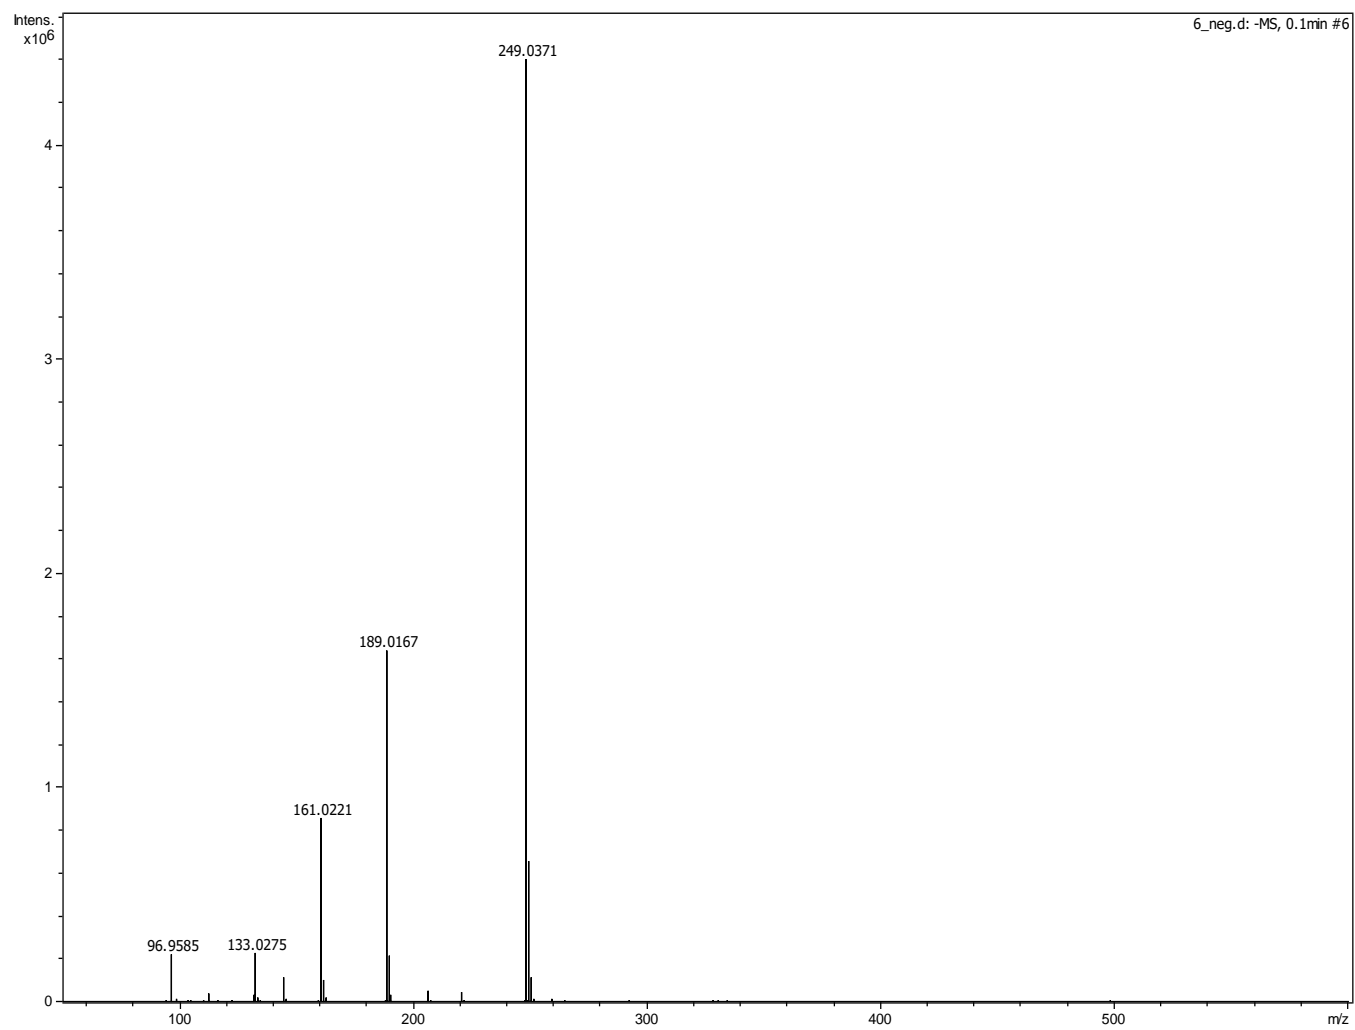

Figure S9. HRESIMS data of compound **2**.

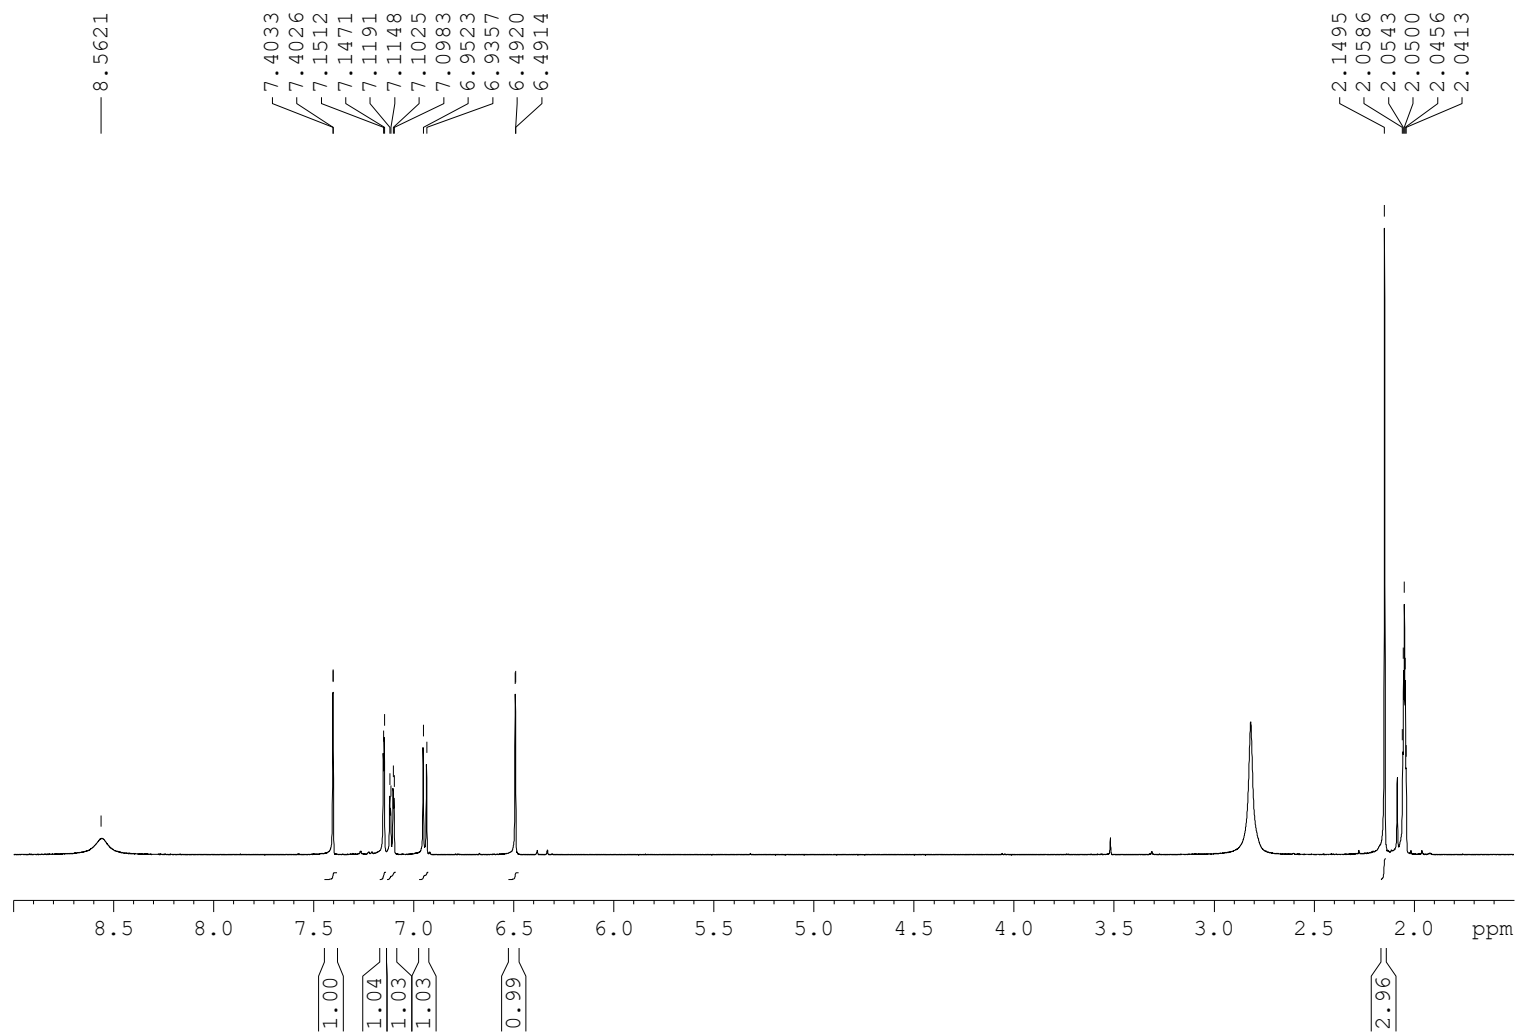

Figure S10.  $^1\text{H}$  NMR spectrum of compound **2** in acetone- $d_6$ .

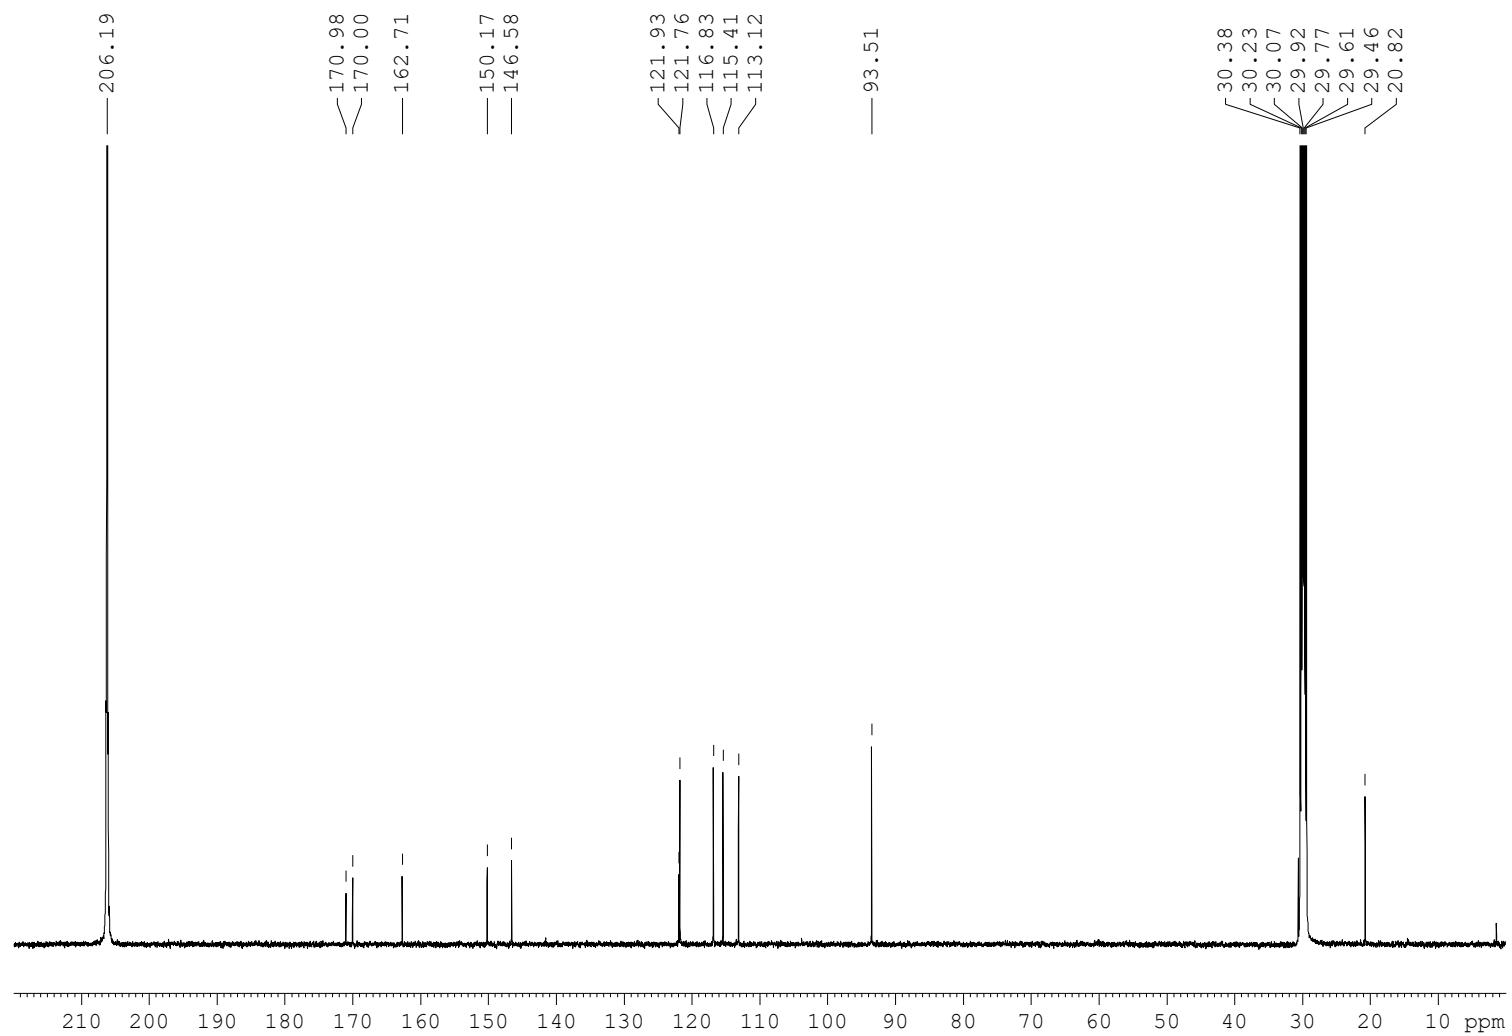

Figure S11.  $^{13}\text{C}$  NMR spectrum of compound **2** in acetone- $d_6$ .

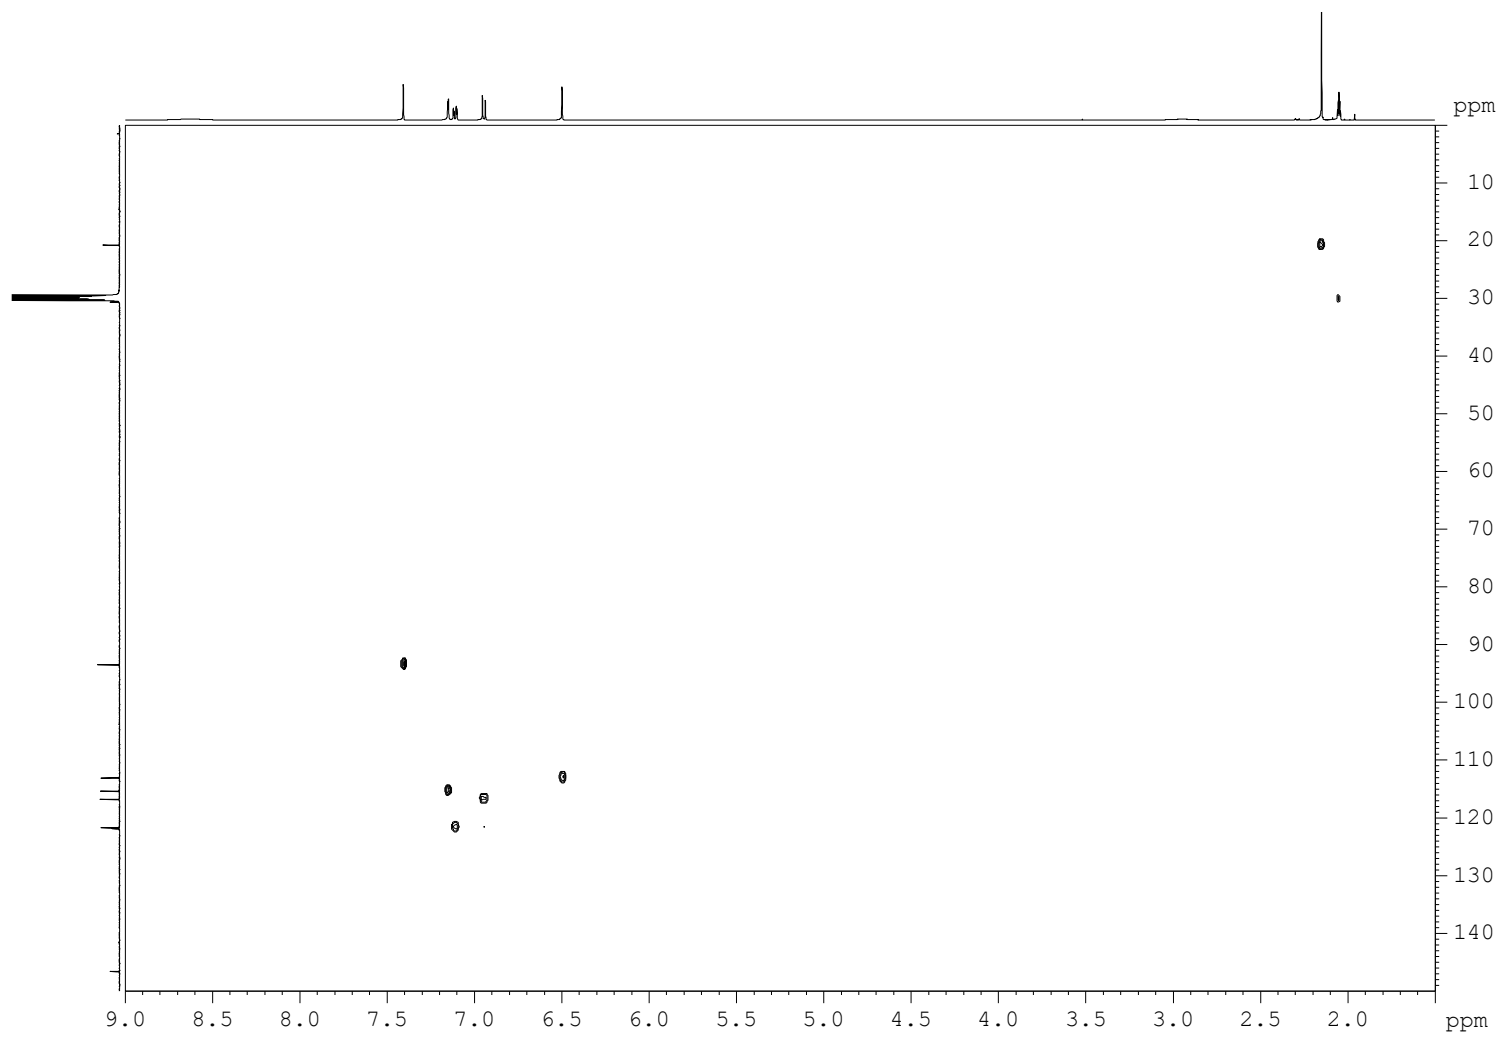

Figure S12. HSQC spectrum of compound **2** in acetone- $d_6$ .

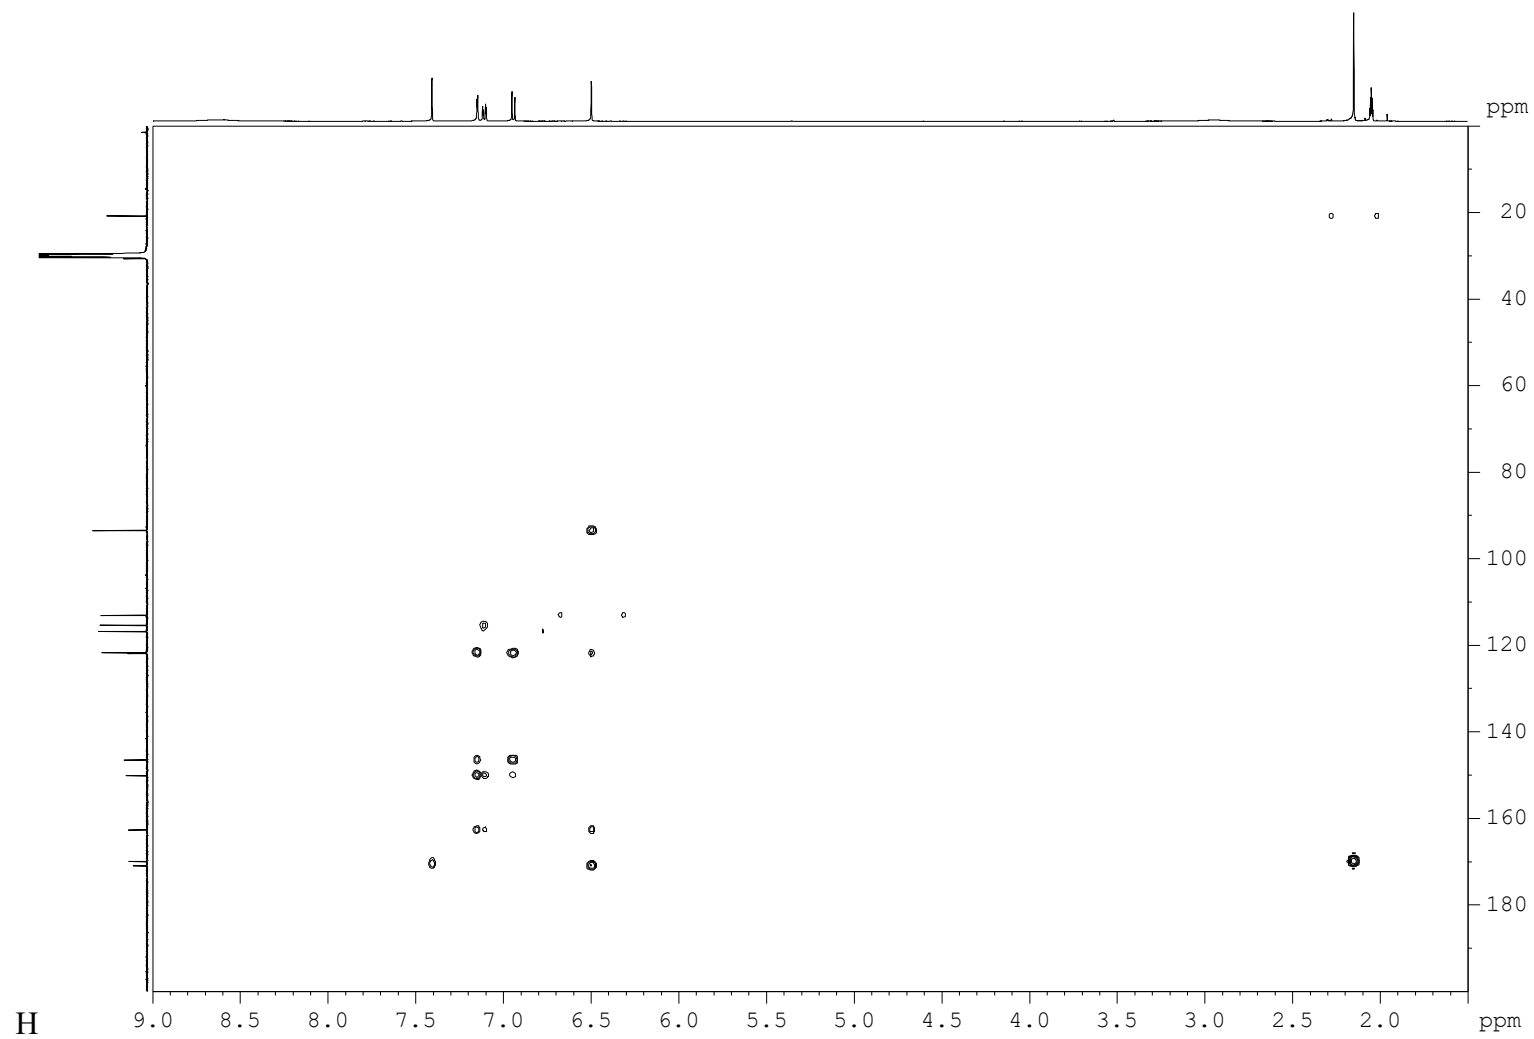

Figure S13. HMBC spectrum of compound **2** in acetone-*d*<sub>6</sub>.

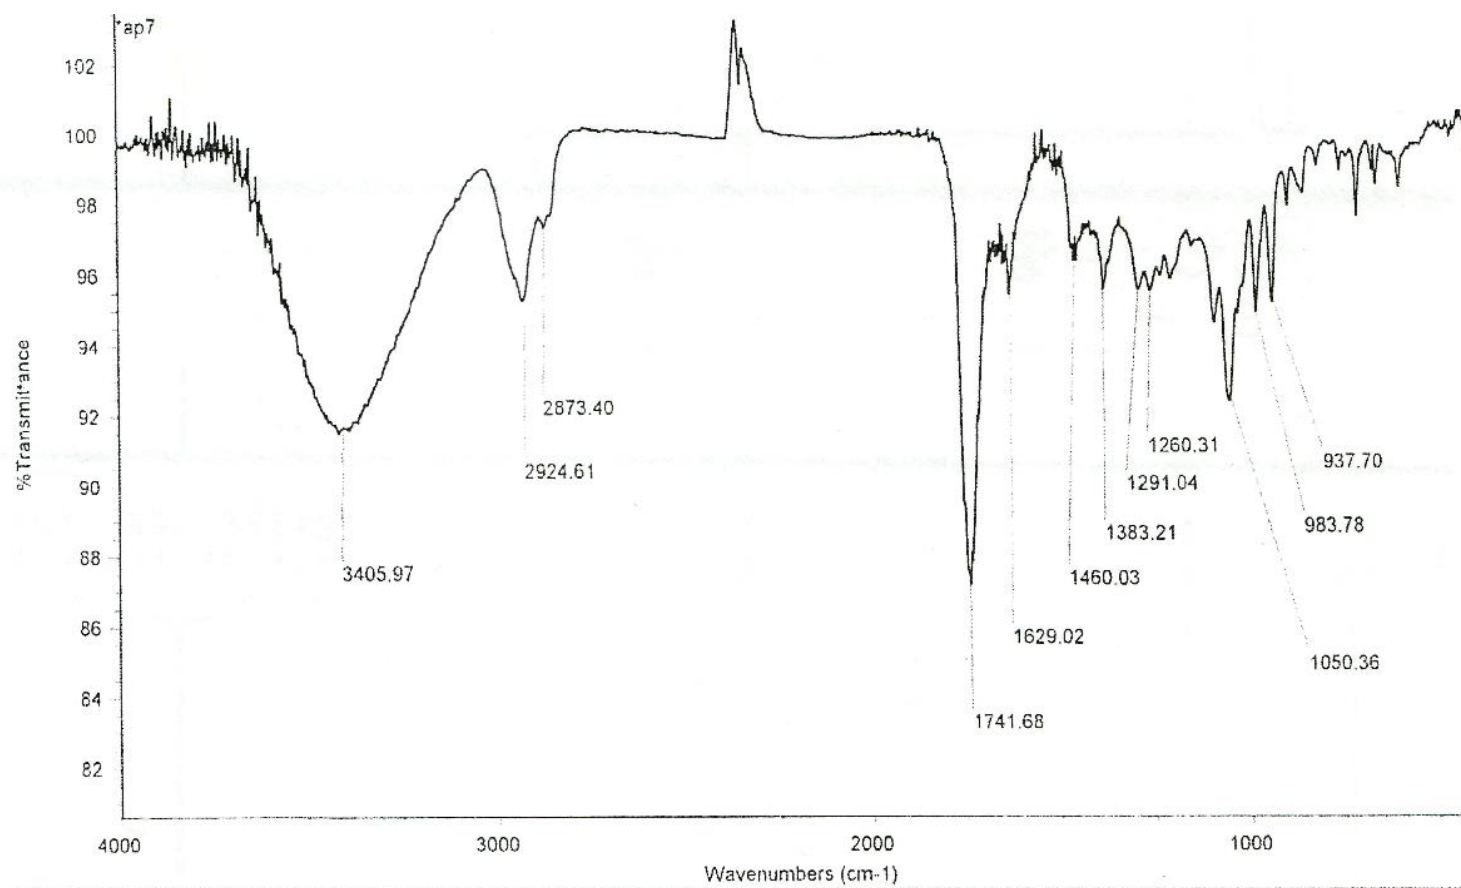

Date: Sun Jun 01 10:39:43 2008

\*ap7

Scans: 32

Resolution: 4.000

Figure S14. IR spectrum of compound **11**.



0519h04rr-av1 #1 RT: 0.05 AV: 1 NL: 2.62E6  
T: [187.50-237.50]

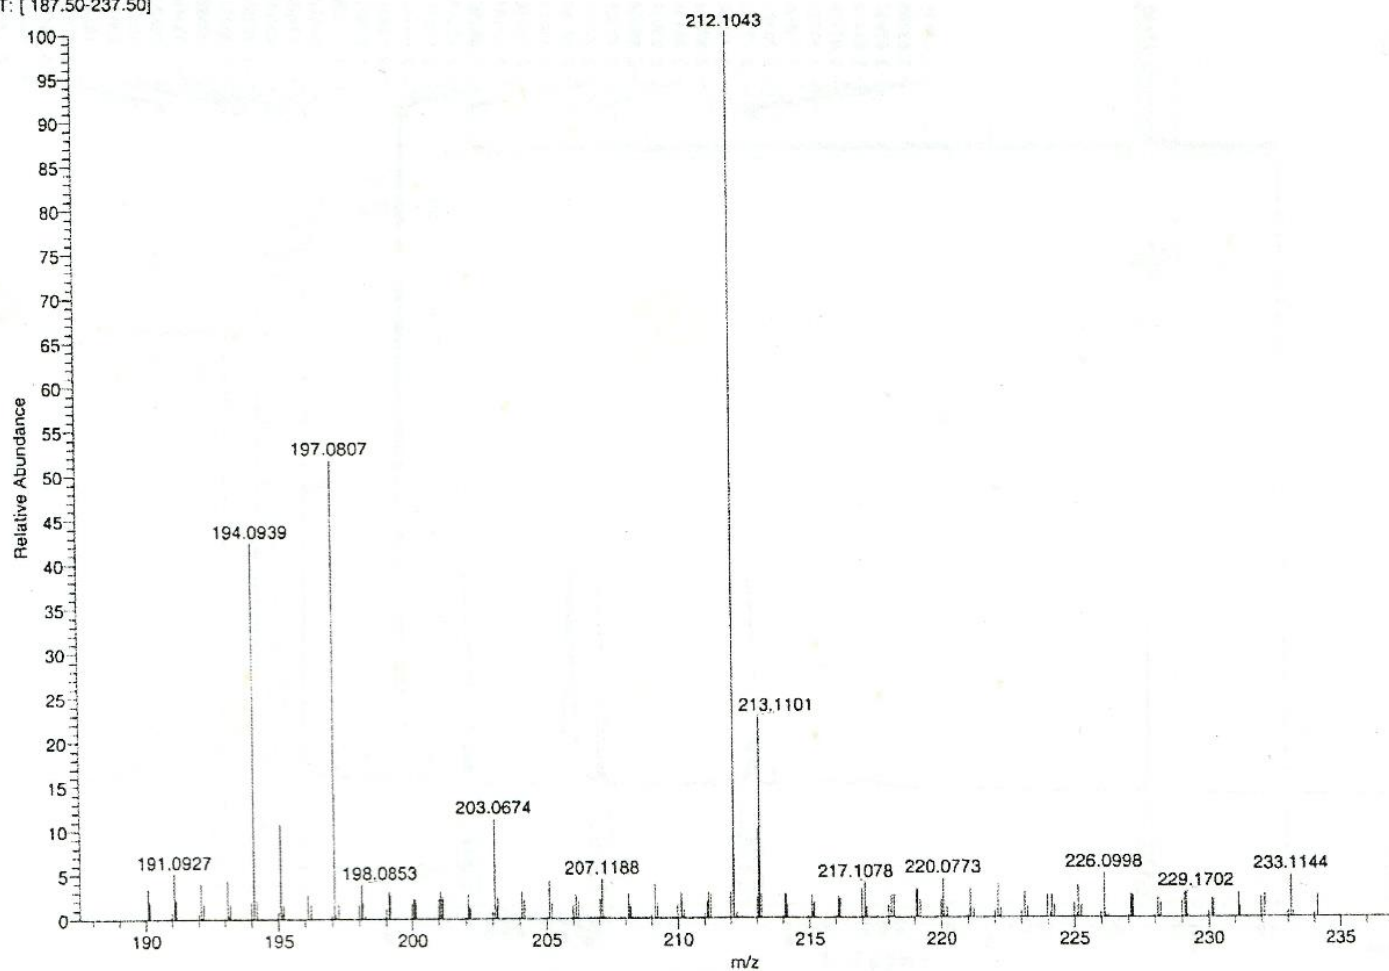

Figure S15. HRESIMS data of compound **11**.

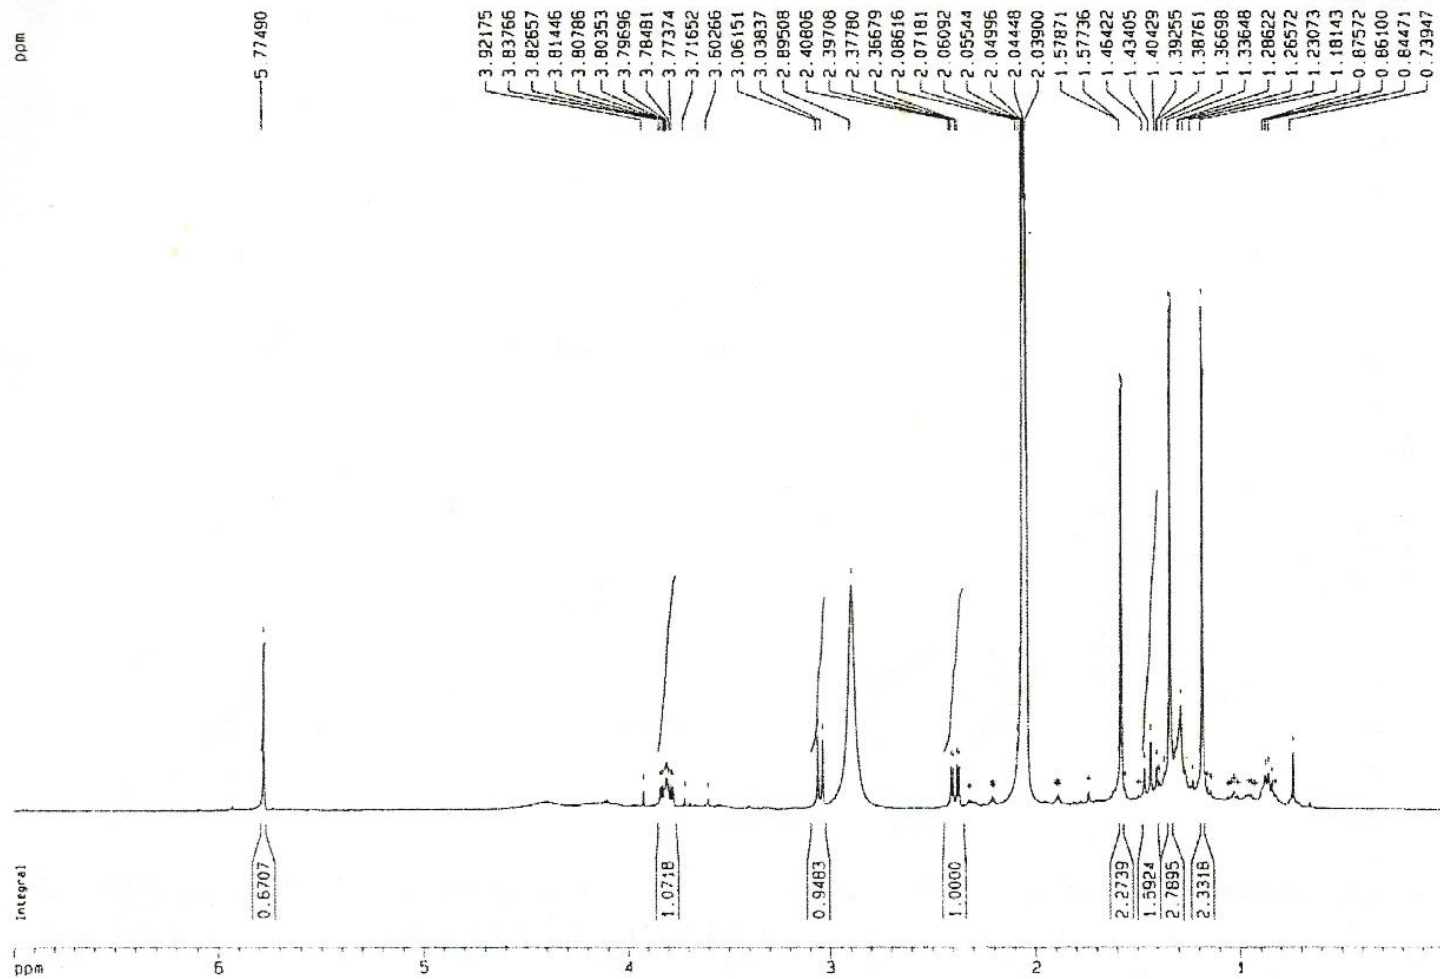

Figure S16.  $^1\text{H}$  NMR spectrum of compound **11** in acetone- $d_6$ .

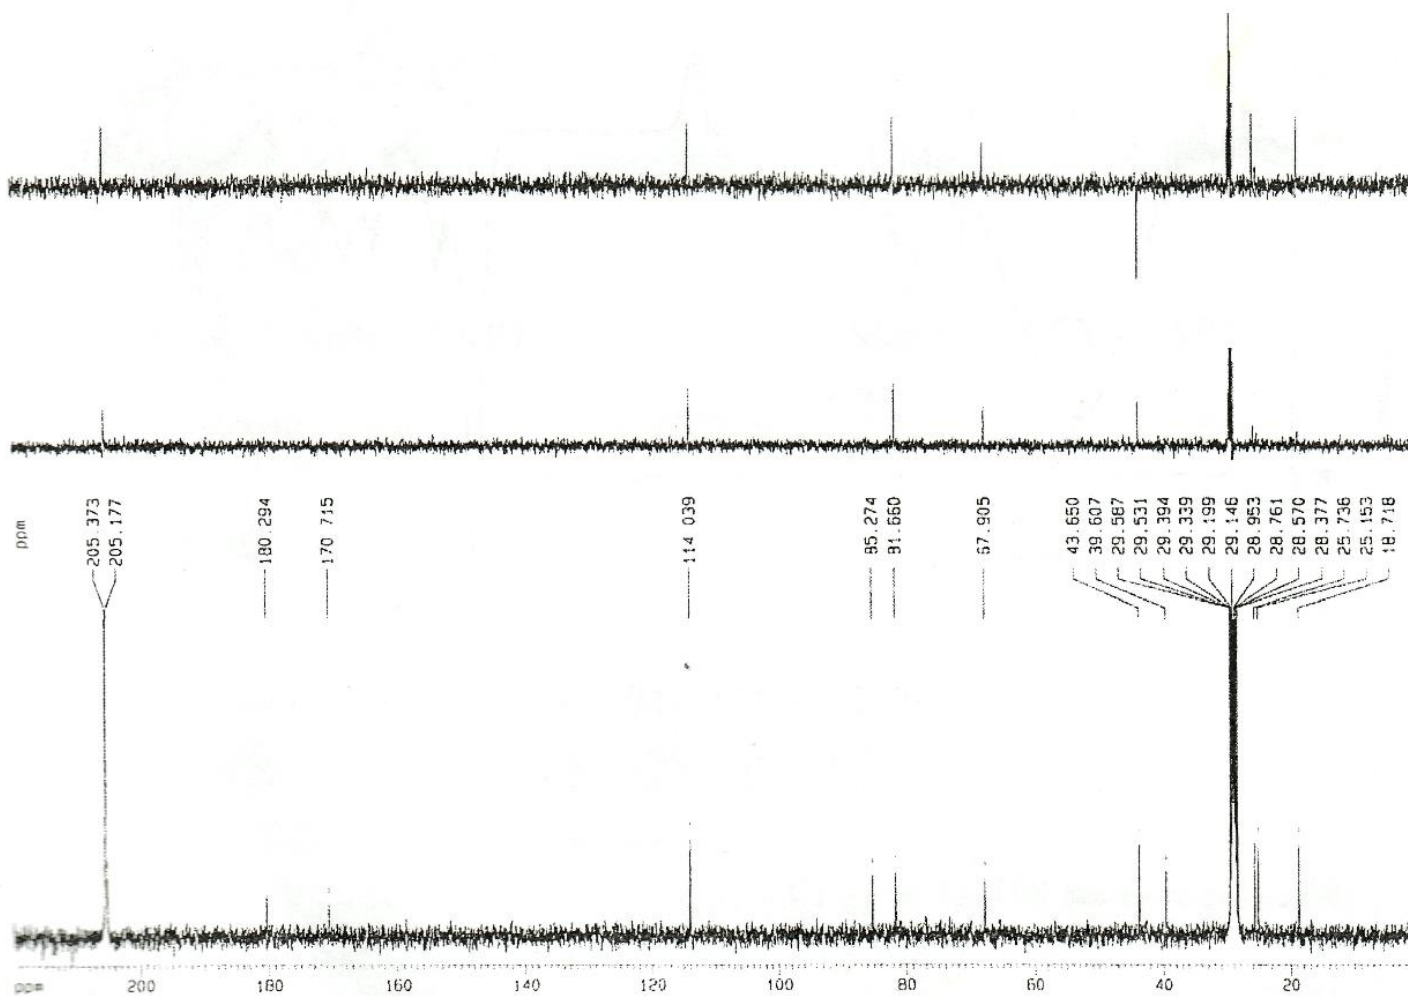

Figure S17. <sup>13</sup>C NMR spectrum and DEPT spectrum of compound **11** in acetone-*d*<sub>6</sub>.

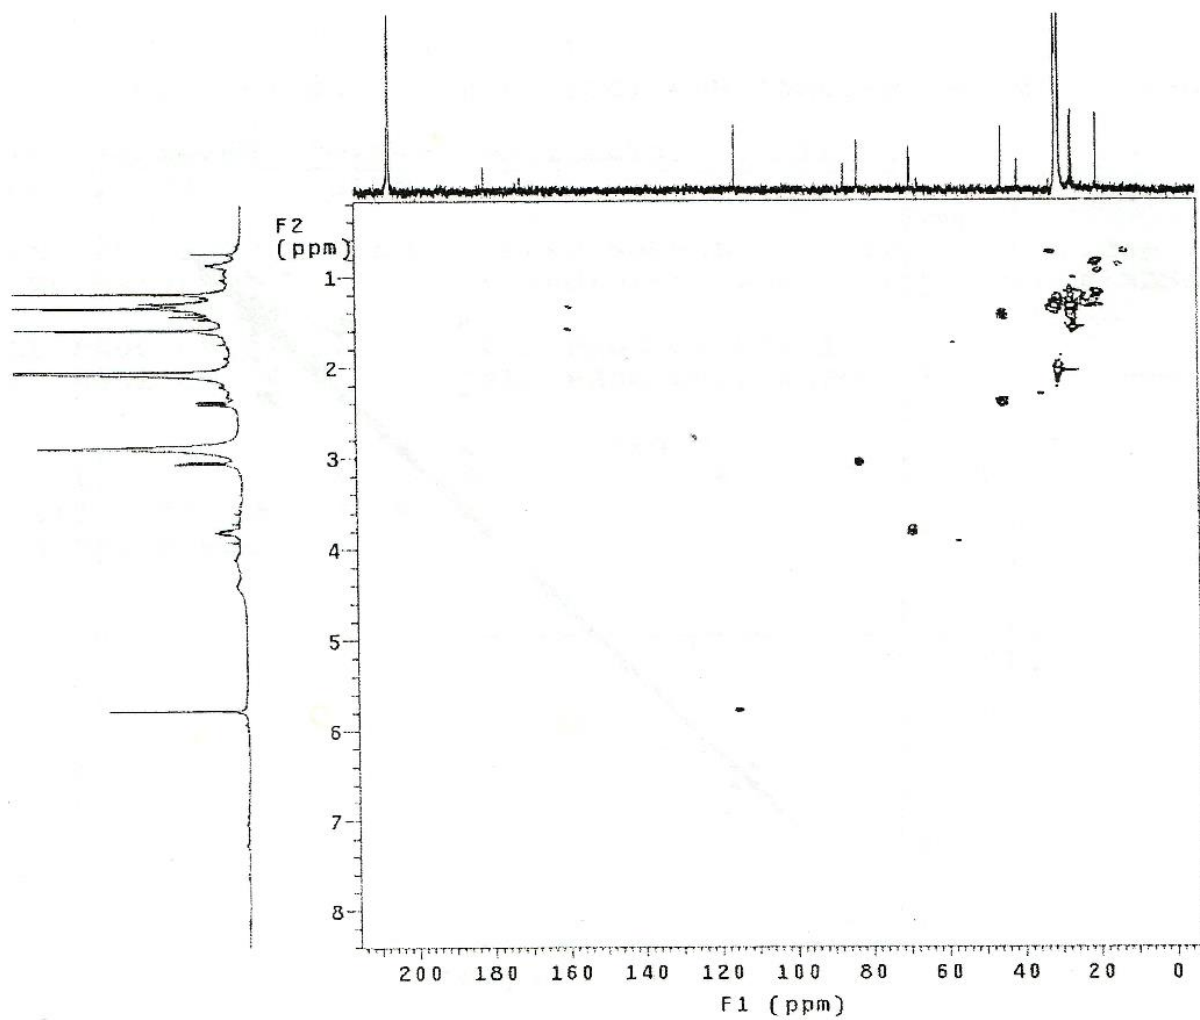

Figure S18. HSQC spectrum of compound **11** in acetone- $d_6$ .

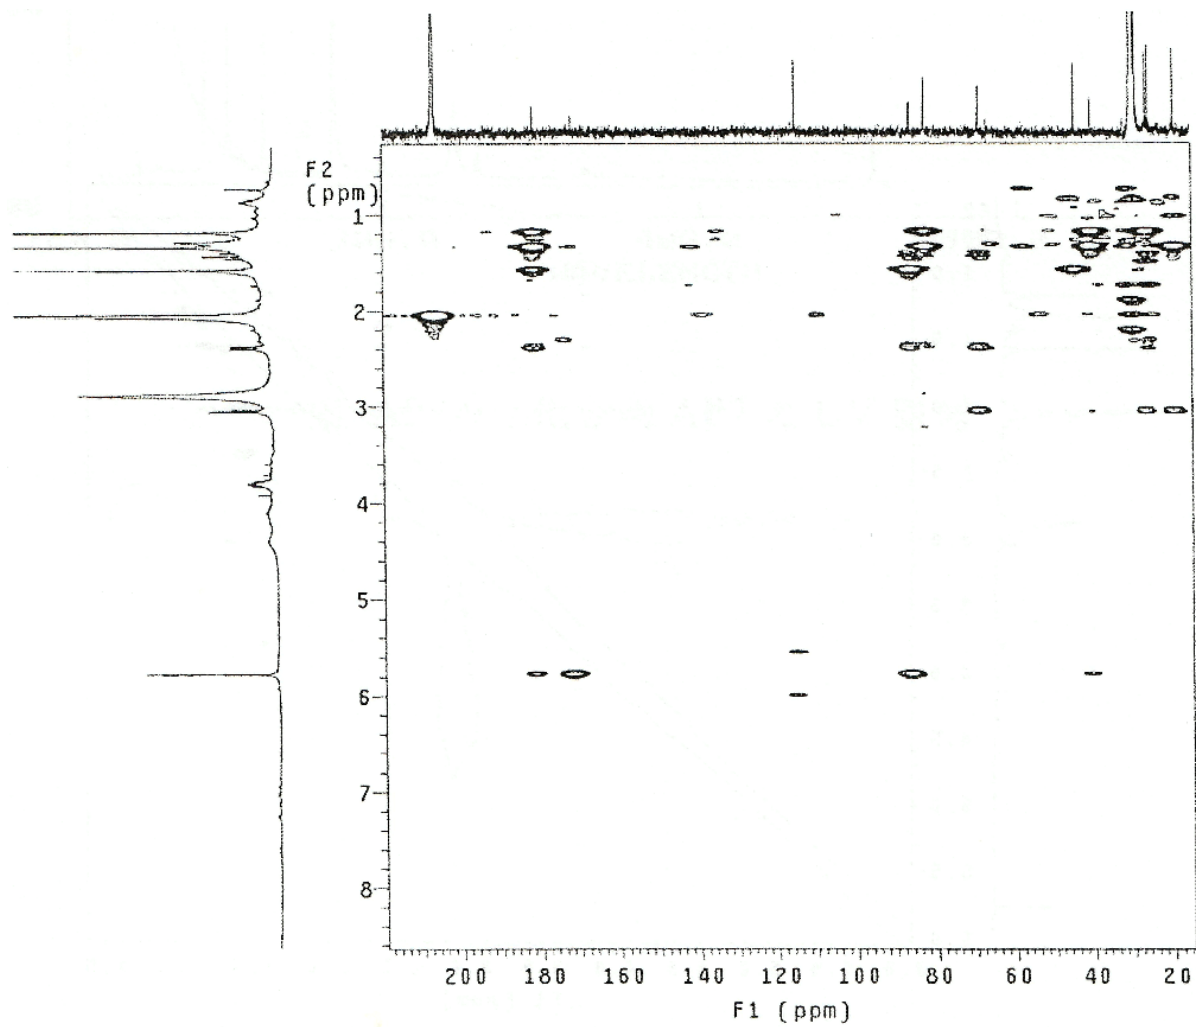

Figure S19. HMBC spectrum of compound **11** in acetone-*d*<sub>6</sub>.

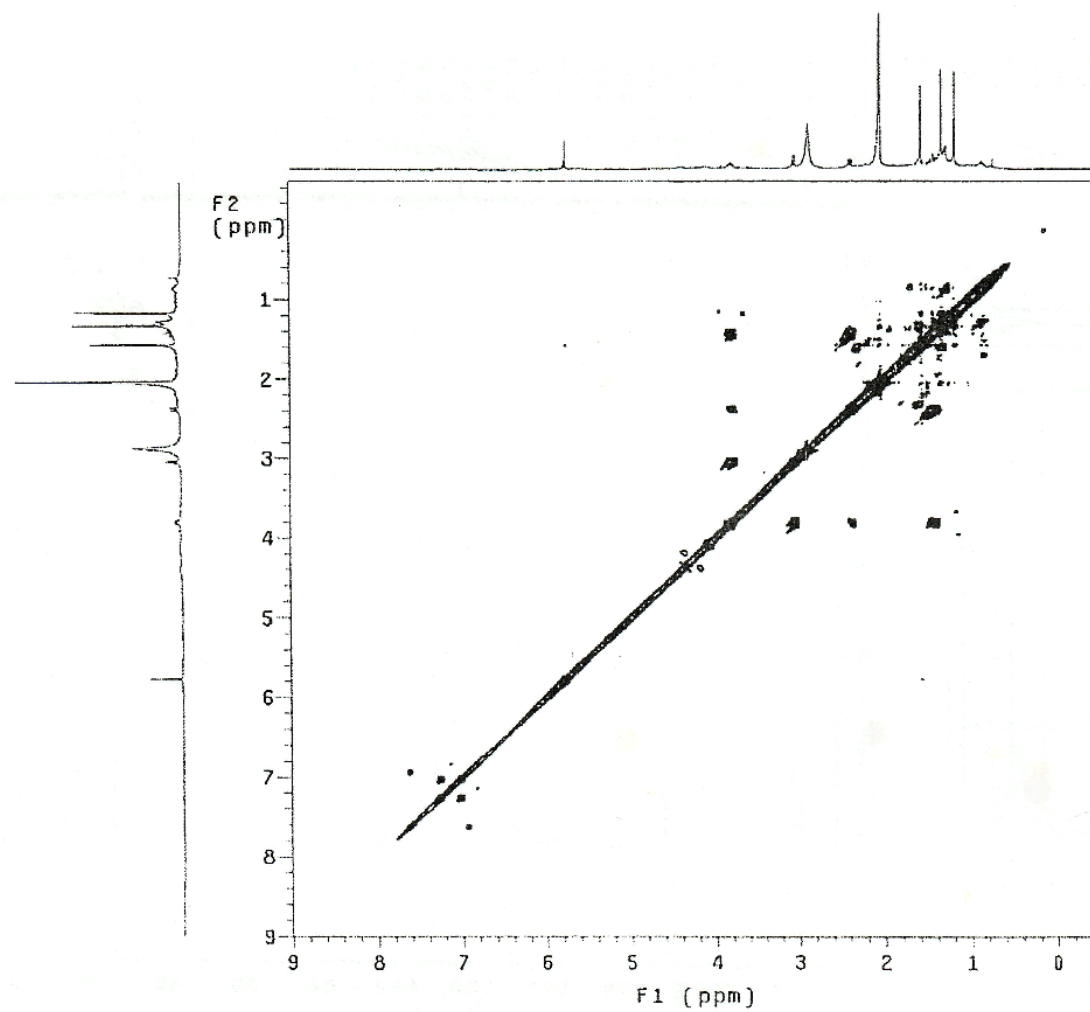

Figure S20. COSY spectrum of compound **11** in acetone- $d_6$ .

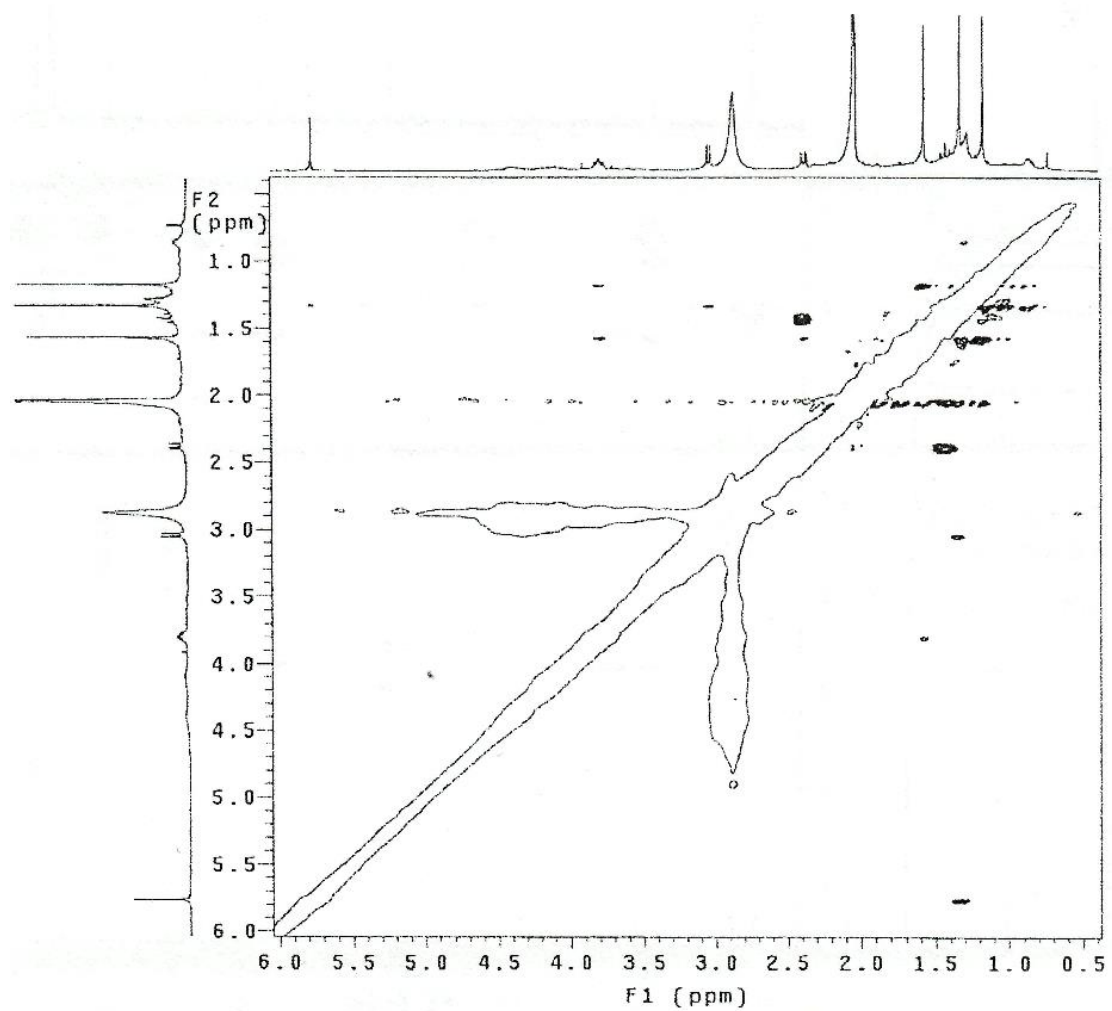

Figure S21. NOESY spectrum of compound **11** in acetone- $d_6$ .

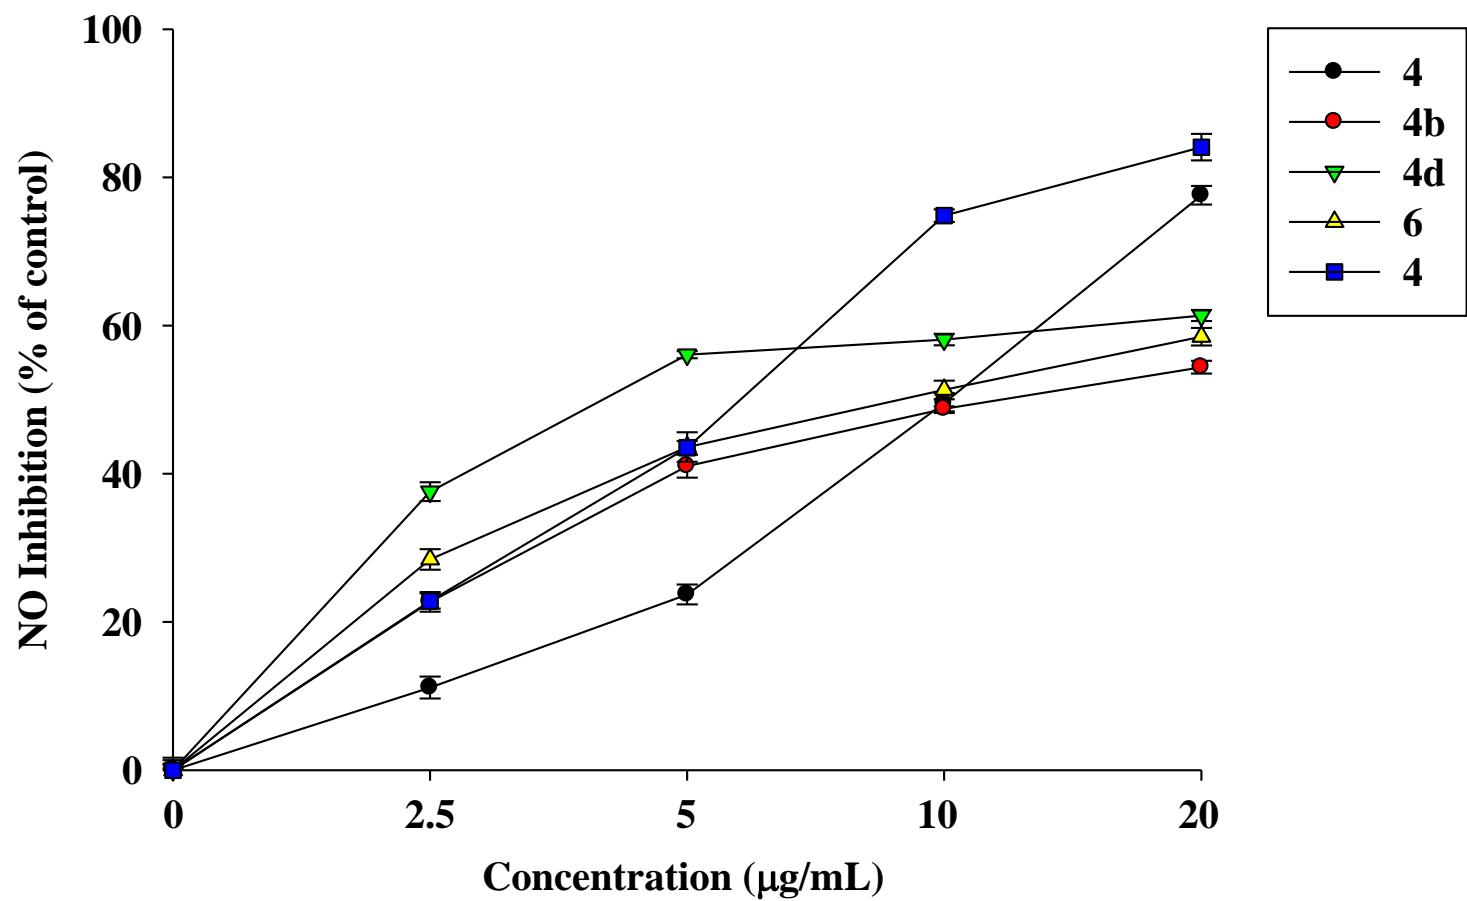

Figure S22. Effects of compounds 4, 4b, 4d, 6, and 7 on NO production in LPS-stimulated RAW 264.7 macrophages



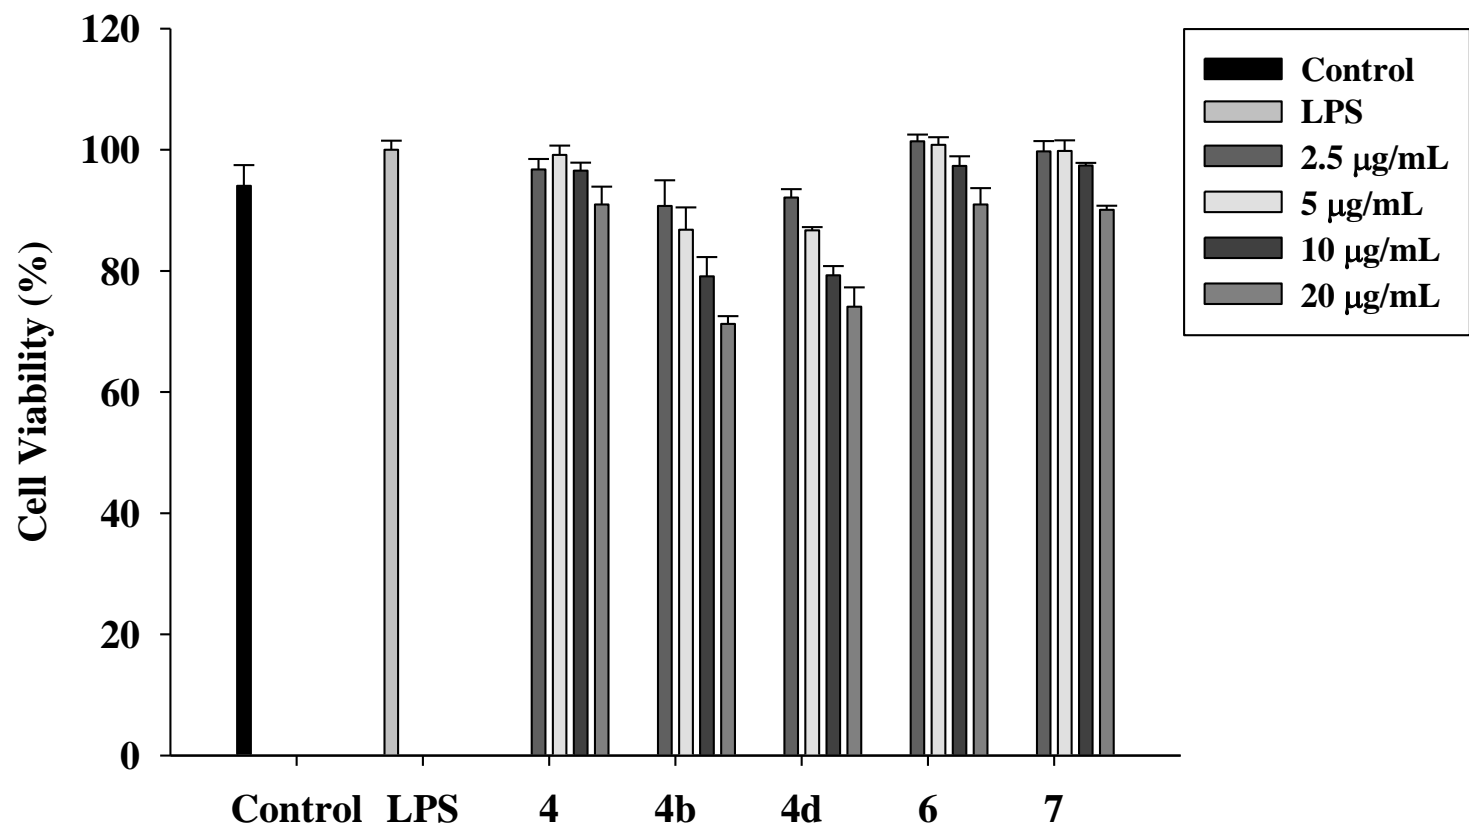

Figure S23. Effects of compounds 4, 4b, 4d, 6, and 7 on cell viability of RAW 264.7 macrophages.
